# Supplementary material for: Effect of Interleukin-15 Receptor Alpha Ablation on the Metabolic Responses to Moderate Exercise Simulated by in vivo Isometric Muscle Contractions
Source: Front Physiol. 2019 Nov 26;10:1439. doi: 10.3389/fphys.2019.01439 (PMC6901992; doi:10.3389/fphys.2019.01439)
Supplement: TABLE S2 — Metabolomics dataset. [file Table_2.XLSX]

## Sheet: Sheet1
Metabolites	log2_FC.Stimulation	FDR.Stimulation	log2_FC.Geno	FDR.Genotype	FDR.Interaction	log2_FC.Geno_Unstim	FDR.Geno_Unstim	log2_FC.Geno_Stim	FDR.Geno_Stim	log2_FC.Stim_Ctrl	FDR.Stim_Ctrl	log2_FC.Stim_Il15raKO	FDR.Stim_Il15raKO
Comparison terms	stim vs unst	stim vs unst	Il15raKO vs ctrl	Il15raKO vs ctrl	Geno x Stim	Il15raKO,unst vs ctrl,unst	Il15raKO,unst vs ctrl,unst	Il15raKO,stim vs ctrl,stim	Il15raKO,stim vs ctrl,stim	Ctrl,stim vs ctrl,unst	Ctrl,stim vs ctrl,unst	Il15raKO,stim vs Il15raKO,unst	Il15raKO,stim vs Il15raKO,unst
IMP	5.75755	2.3402e-11	0.12796	0.904253	0.960141	0.17394	0.998931	0.0819795	0.999987	5.80353	2.08486e-07	5.71157	2.4517e-07
Octanoyl carnitine C8	5.435	7.39095e-07	1.16094	0.507626	0.974797	1.23815	0.742742	1.08373	0.839105	5.51221	0.000747308	5.35778	0.000945343
Hexanoyl carnitine C6	5.22015	8.88071e-07	0.850573	0.652171	0.508777	0.496258	0.982169	1.20489	0.484186	4.86583	3.95099e-06	5.57446	1.03076e-06
NADH	4.69739	0.00104908	-0.671978	0.838191	0.974797	-0.7521	0.996038	-0.591856	0.998952	4.61726	0.0301336	4.77751	0.0244792
Decanoyl carnitine C10	4.59821	1.47658e-08	0.501313	0.72284	0.148885	0.143403	0.999859	0.859224	0.467662	4.2403	3.98527e-09	4.95612	7.79989e-10
Hexadecadienoyl carnitine C16:2	4.58408	6.7708e-07	0.137325	0.941781	0.152408	-0.502237	0.888287	0.776888	0.535929	3.94452	4.94241e-06	5.22364	3.02518e-07
Decadienoyl carnitine C10:2	4.55011	1.56653e-06	0.77946	0.507626	0.851089	0.618256	0.817074	0.940664	0.41076	4.38891	6.44402e-06	4.71132	3.22699e-06
Tetradecadienoyl carnitine C14:2	4.26598	2.19742e-06	1.33182	0.260318	0.632599	1.8144	0.203866	0.849237	0.892219	4.74856	0.000791894	3.7834	0.0047167
Decenoyl carnitine C10:1	3.88297	1.40064e-07	0.565654	0.72284	0.0642542	-0.0504474	1	1.18175	0.161771	3.26687	4.98548e-07	4.49907	1.89596e-08
deoxyadenosine	3.81154	2.28834e-06	-0.0712456	0.971681	0.896074	-0.285899	0.99928	0.143408	0.999987	3.59689	0.00307814	4.02619	0.00126907
Tetradecenoyl carnitine C14:1	3.80741	1.27913e-07	0.849904	0.374322	0.281629	0.555335	0.726212	1.14447	0.077569	3.51284	1.61434e-07	4.10198	3.29738e-08
Linoleoyl carnitine C18:2	3.79297	3.00468e-09	0.130716	0.903676	0.1228	-0.538836	0.731768	0.800268	0.314375	3.12342	6.58911e-05	4.46253	2.17868e-06
GMP	3.77092	6.40167e-12	0.105998	0.838191	0.809175	0.203081	0.956452	0.0089147	1	3.86801	4.73466e-08	3.67384	8.03072e-08
Lauroyl carnitine C12	3.72507	1.25195e-07	0.479326	0.624997	0.148885	0.0704198	0.999987	0.888233	0.13814	3.31616	1.90281e-07	4.13397	1.98397e-08
Myristoyl carnitine C14	3.4965	1.76559e-08	0.422067	0.72284	0.106234	0.0948427	0.999966	0.749291	0.432581	3.16927	8.32419e-09	3.82372	1.17448e-09
Oleyl carnitine C18:1	3.449	3.0031e-05	1.06457	0.582674	0.342144	0.503063	0.986452	1.62608	0.239769	2.88749	0.00148342	4.01051	8.84213e-05
Hexadecenoyl carnitine C16:1	3.29655	6.84181e-06	0.138074	0.91417	0.241276	-0.403559	0.934049	0.679706	0.576299	2.75492	0.000198169	3.83818	9.18018e-06
a-ketoglutarate	3.22699	2.40616e-06	0.271729	0.763243	0.95109	0.195764	0.995641	0.347694	0.924353	3.15103	1.08512e-05	3.30296	6.89127e-06
8-Aminooctanoic acid	3.17842	1.27077e-09	0.0937938	0.88547	0.282887	-0.0172545	1	0.204842	0.887784	3.06737	2.67366e-11	3.28947	1.27638e-11
C24:3	3.1315	0.00826787	1.86219	0.624997	0.0642542	5.256	0.0150669	-1.53162	0.906193	6.52531	0.00237416	-0.262308	0.999985
Glyceraldehyde-3-phosphate	2.96308	1.27913e-07	-0.000193644	0.999288	0.287412	0.22438	0.965701	-0.224767	0.965418	3.18766	3.11137e-08	2.73851	1.47586e-07
succinate	2.93165	1.8039e-09	-0.0809322	0.810113	0.858817	-0.11393	0.938102	-0.0479341	0.999328	2.89865	6.47089e-11	2.96464	5.10212e-11
Palmitoyl carnitine C16	2.90398	7.65715e-07	0.249539	0.815171	0.281629	-0.0600295	0.999997	0.559108	0.659475	2.59441	4.37898e-06	3.21355	5.23964e-07
fumarate	2.90246	1.48144e-09	0.108223	0.826565	0.0329314	0.471687	0.0832538	-0.255241	0.631155	3.26593	9.45244e-12	2.539	1.35121e-10
sedoheptoluse-7-phosphate	2.89785	3.16385e-07	0.473181	0.507626	0.332164	0.236843	0.966362	0.709518	0.151555	2.66151	8.55621e-07	3.13418	1.64317e-07
malate	2.89239	8.13848e-09	0.15164	0.810113	0.152408	0.34807	0.553922	-0.044791	0.999981	3.08882	3.28464e-10	2.69596	1.3687e-09
6-phosphogluconate	2.85807	0.00586664	-0.741933	0.785508	0.56102	-1.4953	0.743886	0.0114289	1	2.1047	0.392291	3.61143	0.0416466
acetyl-CoA	2.8286	0.00173581	-1.05135	0.624997	0.952231	-0.851203	0.971603	-1.2515	0.846137	3.02875	0.11031	2.62845	0.200403
inosine	2.69009	3.28914e-08	-0.0176152	0.972288	0.0748285	0.291181	0.579743	-0.326411	0.454144	2.99889	2.68276e-09	2.3813	2.93881e-08
L-arginino-succinate	2.68419	6.84181e-06	-0.247897	0.785508	0.684329	-0.429387	0.822505	-0.0664064	0.999991	2.5027	7.28901e-05	2.86568	2.06615e-05
Bilirubin	2.64587	0.00501342	-0.412975	0.890571	0.954381	-0.251374	0.999979	-0.574576	0.99754	2.80748	0.206502	2.48427	0.31309
Arachidoyl carnitine C20	2.62355	2.71599e-05	-0.526968	0.72284	0.131196	-1.26262	0.199779	0.208681	0.999435	1.8879	0.00417239	3.3592	3.08665e-05
hypoxanthine	2.24296	3.16385e-07	0.204757	0.72284	0.148885	0.489396	0.181627	-0.079882	0.999419	2.5276	1.03283e-07	1.95832	1.35596e-06
fructose-6-phosphate	2.18108	3.30854e-05	0.325726	0.810113	0.961794	0.290937	0.992435	0.360514	0.977302	2.14629	0.000479788	2.21587	0.000365103
glutathione	2.16325	0.00013628	-0.895919	0.72284	0.893212	-1.02608	0.771089	-0.765763	0.925976	2.03309	0.00405176	2.2934	0.00159785
Stearoyl carnitine C18	2.14742	1.40685e-05	0.22576	0.836887	0.982233	0.207216	0.998875	0.244303	0.997184	2.12887	0.00764964	2.16596	0.00676628
D-glucosamine-1/6-phosphate	2.09414	9.38715e-06	0.344286	0.781433	0.805432	0.229665	0.995517	0.458908	0.875316	1.97951	0.000109297	2.20876	4.00202e-05
D-erythrose-4-phosphate	2.05748	5.52164e-05	0.315732	0.810113	0.985586	0.304014	0.989474	0.327451	0.984579	2.04576	0.000872829	2.0692	0.00079429
D-Galactonic acid	1.93793	0.000204789	0.780515	0.507626	0.954381	0.839975	0.483676	0.721056	0.647531	1.99738	0.00328986	1.87847	0.00519785
xanthine	1.92635	3.78771e-07	-0.0341479	0.963755	0.247865	0.162796	0.913435	-0.231092	0.6867	2.12329	1.80657e-07	1.7294	1.42303e-06
Acetyl carnitine C2	1.9218	1.76559e-08	-0.0858956	0.772272	0.281629	-0.19809	0.43593	0.0262987	0.999961	1.80961	6.14794e-09	2.034	1.81653e-09
AICAR	1.91881	0.000277254	1.07825	0.439382	0.837319	0.916437	0.594774	1.24007	0.270352	1.757	0.0119256	2.08063	0.00355713
ribose-phosphate	1.90706	2.20856e-05	0.171801	0.85351	0.952231	0.126844	0.99951	0.216759	0.990559	1.8621	0.000264589	1.95202	0.000174673
Butyryl carnitine C4	1.89463	9.053e-05	0.270252	0.810113	0.472974	-0.0172638	1	0.557768	0.711766	1.60712	0.00543024	2.18215	0.000480536
N-acetyl-gln	1.80175	0.0134007	1.17566	0.687581	0.95109	1.35392	0.774198	0.997395	0.932124	1.98002	0.193012	1.62349	0.370883
C24:4	1.77379	0.00831253	0.670063	0.763243	0.0642542	2.50035	0.0491872	-1.16022	0.716807	3.60407	0.00293094	-0.0564952	1
sorbitol	1.75771	6.84181e-06	0.419908	0.553533	0.37358	0.209005	0.977942	0.630811	0.212651	1.54681	0.000121301	1.96862	1.28963e-05
D-gluconate	1.74339	0.000565883	1.0328	0.288204	0.325433	0.551182	0.88264	1.51441	0.0498566	1.26177	0.0901942	2.225	0.00239932
C22:3	1.6267	0.00329684	0.21352	0.904253	0.0625285	1.77515	0.100721	-1.34811	0.3266	3.18833	0.0047725	0.0650763	1
Fructose	1.56955	1.26415e-06	0.333571	0.553533	0.989643	0.335938	0.595668	0.331204	0.61042	1.57192	3.29121e-06	1.56719	3.39002e-06
3-hydroxybutyrate	1.52285	2.41645e-05	0.186216	0.890255	0.79552	0.284752	0.982126	0.0876807	0.999976	1.62138	0.000139508	1.42431	0.00043382
glucose	1.49875	0.000820756	0.826732	0.526907	0.483343	0.506714	0.925928	1.14675	0.237887	1.17873	0.0805136	1.81877	0.00551061
2-keto-isocaproate(leu)	1.40018	3.10478e-05	0.00301887	0.997615	0.974797	0.0157006	1	-0.00966282	1	1.41286	0.000345073	1.3875	0.000403294
6-phosphogluconolactone	1.37295	0.00418444	0.120746	0.965594	0.423126	-0.315979	0.995722	0.557472	0.927799	0.936229	0.405193	1.80968	0.0219907
5-keto-D-gluconic acid	1.2927	8.00821e-06	0.753286	0.415306	0.85753	0.695977	0.386777	0.810596	0.23815	1.2354	7.8121e-05	1.35001	3.4427e-05
C15:1	1.27958	0.00785992	-0.39876	0.826565	0.0642542	0.913222	0.735072	-1.71074	0.126379	2.59157	0.00265818	-0.0323979	1
C22:2	1.26988	0.00845715	0.0760952	0.967629	0.0642542	1.36695	0.184513	-1.21476	0.291955	2.56074	0.00320704	-0.0209815	1
deoxyribose-phosphate	1.24924	0.000215855	0.926905	0.0480609	0.961794	0.888633	0.160962	0.965176	0.106938	1.21097	0.0520011	1.28751	0.0367861
C24:2	1.24242	0.0127711	-0.211247	0.903676	0.174797	0.706445	0.872764	-1.12894	0.46101	2.16012	0.0424829	0.324732	0.997377
Indolelactic acid	1.22551	0.00022254	-0.27132	0.810113	0.974797	-0.254572	0.987827	-0.288068	0.97728	1.24226	0.00416542	1.20877	0.00509752
Uric acid	1.20976	3.9393e-06	0.0308133	0.972288	0.320551	0.180954	0.988931	-0.119327	0.998842	1.3599	5.47755e-06	1.05962	5.83512e-05
C25:1	1.20972	0.104404	0.0653891	0.987076	0.0642542	2.44776	0.427442	-2.31699	0.48833	3.59209	0.0216242	-1.17266	0.825208
hippuric acid	1.20526	0.0208999	-3.32761	0.0106834	0.35626	-2.7048	0.00491058	-3.95043	7.43173e-05	1.82808	0.0707806	0.582448	0.930069
C14:1(Myristoleic acid)	1.19665	0.00129594	0.121756	0.919407	0.0661634	0.91998	0.172896	-0.676468	0.481979	1.99488	0.000860763	0.398429	0.855383
C17:2	1.1456	0.00575955	-0.0345238	0.976384	0.0642542	1.13894	0.231126	-1.20798	0.181359	2.31906	0.00154666	-0.027865	1
glucosamine	1.14025	0.000320379	0.582603	0.274591	0.336757	0.304819	0.895429	0.860388	0.0493921	0.862463	0.0448633	1.41803	0.00145956
2-Hydroxycaproic acid	1.13747	2.17749e-07	-0.0342949	0.967629	0.913022	-0.0120618	1	-0.0565281	0.99994	1.15971	1.34842e-07	1.11524	2.00739e-07
2-Hydroxyoctanoic acid	1.10433	4.43173e-05	-0.0198269	0.976384	0.81852	-0.0937333	0.999335	0.0540795	0.999973	1.03042	0.00110287	1.17824	0.00035806
C14:2	1.10018	3.74087e-05	0.417814	0.726977	0.470155	0.565631	0.724765	0.269996	0.988374	1.248	0.000168797	0.952361	0.0016554
C26:1	1.09088	0.0590413	-0.0283831	0.98783	0.0642542	1.80856	0.414289	-1.86533	0.380508	2.92782	0.0112408	-0.746067	0.900692
N-acetyl-tyr	1.0552	0.0020909	-0.387816	0.781433	0.412054	-0.0854662	0.999993	-0.690166	0.675852	1.35755	0.0115193	0.75285	0.243604
C25:0	1.03885	0.00210279	0.0448734	0.967629	0.185822	0.612627	0.633742	-0.52288	0.776342	1.6066	0.0163084	0.471098	0.861559
Hydroxyindoleacetic acid	1.03516	0.00643554	-0.132654	0.967629	0.733657	0.0726216	1	-0.337929	0.997402	1.24044	0.0624685	0.829887	0.327774
Tetradecanedioic acid	1.01523	9.58765e-05	-0.0388441	0.972288	0.0437599	0.611348	0.468337	-0.689036	0.340177	1.66542	2.15984e-05	0.36504	0.408204
2-hydroxy-b-methylvalerate	0.974997	0.000122494	0.0153001	0.976384	0.387989	0.19942	0.97042	-0.168819	0.987127	1.15912	0.000544764	0.790877	0.0103501
Sebacic acid	0.965062	0.0590413	0.681213	0.624997	0.751697	0.991454	0.579651	0.370973	0.993373	1.2753	0.349288	0.654821	0.90319
N-acetyl-gly	0.964941	1.5484e-05	0.516561	0.0669313	0.925016	0.481477	0.0643784	0.551646	0.026421	0.929856	0.000188921	1.00003	9.84756e-05
N-acetyl-met	0.963081	6.03389e-08	0.0077076	0.987156	0.0642542	0.139981	0.941158	-0.124565	0.965548	1.09535	5.36699e-09	0.830809	9.3183e-08
N-acetyl-cys	0.939398	7.92504e-05	0.048565	0.965989	0.311209	0.243519	0.892752	-0.146389	0.99033	1.13435	0.000268549	0.744444	0.00765261
C17:1	0.936245	0.0430521	-0.441095	0.75081	0.114766	0.606557	0.918006	-1.48875	0.146655	1.9839	0.0527186	-0.111407	0.999993
N-acetyl-glu	0.922649	0.000271411	0.19227	0.763243	0.955699	0.220268	0.938546	0.164271	0.985013	0.950648	0.00500592	0.89465	0.00774919
2-Oxoadipic acid	0.922487	0.000244732	0.291163	0.553533	0.56102	0.430903	0.320485	0.151424	0.983728	1.06223	0.00180269	0.782748	0.0164288
2-Hydroxyvaleric acid	0.900201	0.00638858	0.330925	0.72284	0.760283	0.164321	0.998809	0.49753	0.759211	0.733597	0.309632	1.06681	0.0653756
C19:1	0.893619	0.0134007	-0.218254	0.838191	0.0642542	0.818744	0.388812	-1.25525	0.0584823	1.93062	0.00393773	-0.143379	0.999624
C15:2	0.890974	0.000263554	0.51573	0.72284	0.918867	0.569517	0.814436	0.461943	0.918113	0.944761	0.00384974	0.837187	0.00921529
Hypotaurine	0.874312	0.000367993	0.842595	0.763243	0.81852	0.924164	0.89295	0.761026	0.953598	0.955881	0.00468905	0.792744	0.0171697
2-hydroxybutyrate	0.870598	7.73934e-06	0.160489	0.781433	0.152408	0.338018	0.45689	-0.0170396	1	1.04813	8.1037e-06	0.69307	0.000362153
N-acetyl-phe	0.859305	9.58765e-05	-0.258244	0.624997	0.427906	-0.115233	0.994175	-0.401255	0.319484	1.00232	0.000474545	0.716294	0.00667759
C23:1	0.845667	0.142499	0.142645	0.967629	0.148885	1.43649	0.590665	-1.1512	0.791864	2.13951	0.100397	-0.44818	0.993551
N-Octanoylglycine	0.843659	0.000367993	0.607986	0.193145	0.950131	0.562045	0.233559	0.653927	0.11953	0.797718	0.0131371	0.8896	0.00616014
Catechol sulfate	0.838171	0.00243019	-0.397816	0.826565	0.407546	-0.148054	0.999956	-0.647578	0.890116	1.08793	0.0130591	0.588409	0.282184
C21:1	0.830694	0.10325	-0.296361	0.904253	0.192612	0.680107	0.956631	-1.27283	0.563569	1.80716	0.11464	-0.145774	0.999976
Cellobiose	0.827111	0.000204604	-0.176823	0.790565	0.276159	0.041897	0.999993	-0.395543	0.513699	1.04583	0.000631901	0.608391	0.0321792
C11:0(Undecanoic acid)	0.826824	0.0775225	-0.399985	0.838191	0.357444	0.204863	0.999916	-1.00483	0.743685	1.43167	0.190829	0.221977	0.999463
Glutaconic acid	0.8238	1.03717e-05	0.125487	0.810113	0.0661634	0.379161	0.278429	-0.128187	0.982118	1.07747	6.14112e-06	0.570126	0.00180743
orotate	0.820438	8.05718e-07	0.052661	0.959739	0.0661634	0.219347	0.796021	-0.114025	0.988711	0.987124	2.62745e-07	0.653752	1.53061e-05
3-Hydroxyisovaleric acid	0.802139	6.7708e-07	0.293021	0.158817	0.472222	0.348542	0.0356504	0.237499	0.247555	0.85766	5.73875e-07	0.746617	2.28386e-06
Citramalic acid	0.774792	8.8894e-07	-0.0711833	0.919407	0.368291	-0.140801	0.979113	-0.00156571	1	0.705174	5.19451e-06	0.844409	8.76837e-07
Indole-3-propionate (IPA)	0.761621	0.000636622	-0.738942	0.621279	0.961794	-0.719426	0.651852	-0.758458	0.599358	0.781137	0.0135773	0.742105	0.0189709
lactate	0.713619	3.0031e-05	-0.199038	0.72284	0.148885	-0.00503353	1	-0.393043	0.223734	0.907624	3.80482e-05	0.519614	0.0042951
C16:2	0.695803	0.0140386	0.071514	0.959739	0.148885	0.608432	0.360846	-0.465403	0.653634	1.23272	0.0169998	0.158886	0.997425
C21:0	0.693841	0.0255547	-0.277701	0.763243	0.247865	0.224568	0.995447	-0.77997	0.365781	1.19611	0.0872915	0.191572	0.998243
indole	0.679348	0.0156696	-1.40994	0.186594	0.0437599	-0.324649	0.99272	-2.49524	0.00216833	1.76464	0.00121199	-0.405947	0.793509
3-4-Dihydroxyhydrocinnamic acid	0.661115	5.25795e-05	-0.0364763	0.967629	0.878036	-0.000247885	1	-0.0727048	0.999438	0.697343	0.000496035	0.624886	0.0012331
p-hydroxyphenyllactate	0.661115	5.25795e-05	-0.0364763	0.967629	0.878036	-0.000247885	1	-0.0727048	0.999438	0.697343	0.000496035	0.624886	0.0012331
C24:5	0.651656	0.000197993	0.185815	0.88547	0.230493	0.373332	0.914171	-0.00170055	1	0.839172	0.000514111	0.46414	0.0374925
4-Pyridoxic acid	0.650524	0.0218623	0.0296461	0.972288	0.925016	-0.0656276	0.999993	0.12492	0.999716	0.55525	0.67253	0.745798	0.371001
hydroxyphenylpyruvate	0.641854	3.64512e-05	0.0436767	0.965594	0.759274	0.0938227	0.997018	-0.00646937	1	0.692	0.000252142	0.591708	0.000953
C23:0	0.618232	0.062211	-0.184204	0.88547	0.0642542	0.82017	0.404067	-1.18858	0.0884213	1.62261	0.0144223	-0.386141	0.936419
C15:0	0.607146	0.106825	-0.768557	0.571221	0.148885	0.0592091	1	-1.59632	0.069998	1.43491	0.0823128	-0.22062	0.998505
phenylpyruvate	0.600743	3.12599e-05	-0.122661	0.810113	0.625059	-0.0640497	0.999317	-0.181272	0.871014	0.659354	0.000170814	0.542132	0.000914733
N-Tiglylglycine	0.598199	0.000244732	0.225093	0.810113	0.867607	0.269142	0.947223	0.181044	0.992531	0.642248	0.00307846	0.554151	0.00903041
Indoxyl sulfate	0.596178	0.000979284	-1.74962	0.0321666	0.974797	-1.75881	0.00322561	-1.74043	0.00351638	0.586988	0.027807	0.605367	0.0230019
N-Formyl-L-methionine	0.590925	8.41756e-06	0.0683123	0.89605	0.954381	0.0790886	0.996134	0.0575359	0.999343	0.601702	4.74515e-05	0.580149	6.6412e-05
Cysteine-glutathione disulphide	0.590196	0.012123	0.439068	0.406197	0.822779	0.555079	0.412319	0.323058	0.88686	0.706207	0.230545	0.474186	0.627269
3-Hydroxymethylglutarate(leu)	0.572869	0.000176484	0.216458	0.624997	0.913022	0.249296	0.661963	0.183621	0.882829	0.605707	0.00222154	0.540032	0.00528834
citrate/isocitrate	0.567313	0.00810449	0.17754	0.810113	0.952231	0.218285	0.972232	0.136796	0.997602	0.608058	0.136785	0.526568	0.24066
C16:1(Palmitoleic acid)	0.552975	0.141062	-0.130389	0.959806	0.395327	0.337373	0.992089	-0.598151	0.880393	1.02074	0.33051	0.0852128	0.999994
N-acetyl-ala	0.546567	4.44185e-06	0.0791854	0.810113	0.95109	0.093144	0.953293	0.0652269	0.992029	0.560525	1.58783e-05	0.532608	2.57535e-05
CDP	0.533896	0.20863	-0.289628	0.826565	0.960141	-0.360267	0.990647	-0.21899	0.999398	0.463258	0.967349	0.604534	0.894714
C17:0	0.522723	0.0684567	-0.550246	0.624997	0.0933804	0.185099	0.998945	-1.28559	0.0536806	1.25807	0.0306616	-0.212622	0.993336
N-acetyl-val	0.511459	0.00155671	0.273663	0.810509	0.952231	0.301006	0.969573	0.24632	0.988792	0.538802	0.0296421	0.484117	0.0546851
CMP	0.50988	0.0113415	-0.0801231	0.965989	0.152408	0.285784	0.969194	-0.44603	0.798993	0.875787	0.0151676	0.143973	0.989643
C19:0	0.493707	0.0683591	-0.316029	0.72284	0.148885	0.252038	0.986382	-0.884097	0.162847	1.06177	0.0571563	-0.07436	0.999976
Indole-3-pyruvic acid	0.473281	0.179541	-0.575868	0.72284	0.960141	-0.522296	0.959376	-0.629441	0.906759	0.526853	0.868505	0.419708	0.949262
C14:0(Myristic acid)	0.470143	0.0120519	-0.290312	0.763243	0.0748285	0.164505	0.997014	-0.745128	0.198875	0.924959	0.00655387	0.0153263	1
2-dehydrogluconate	0.459396	3.10478e-05	0.715419	0.0669313	0.974797	0.710023	0.024229	0.720815	0.0219619	0.454001	0.000416146	0.464792	0.000339991
Galacturonic acid	0.459396	3.10478e-05	0.715419	0.0669313	0.974797	0.710023	0.024229	0.720815	0.0219619	0.454001	0.000416146	0.464792	0.000339991
adenosine	0.453039	0.0695589	-0.121537	0.903676	0.590051	0.0842652	0.999947	-0.327339	0.921798	0.658841	0.309664	0.247237	0.971355
creatine	0.450397	6.84181e-06	-0.0659468	0.763243	0.954381	-0.0798227	0.959755	-0.0520708	0.995449	0.436521	0.00537275	0.464273	0.00339826
UDP-glucuronate	0.442	0.00161296	0.135653	0.82996	0.952231	0.112389	0.996881	0.158918	0.980736	0.418735	0.0564477	0.465264	0.0310088
C24:6	0.433701	0.00575955	0.140869	0.919407	0.81852	0.206443	0.994658	0.075295	0.999983	0.499275	0.0669228	0.368127	0.250284
1_3-diphosphoglyceric acid	0.42727	2.40616e-06	-0.0241902	0.967629	0.0329314	0.151641	0.895393	-0.200021	0.718962	0.603101	2.92976e-07	0.251438	0.00104599
C22:1(Erucic acid)	0.417403	0.0839893	-0.176997	0.810113	0.0661634	0.480584	0.655496	-0.834578	0.114973	1.07498	0.0485553	-0.240178	0.981442
Dihydrouracil	0.414598	0.00275976	-0.714608	0.0669313	0.395327	-0.585204	0.0899415	-0.844011	0.00766303	0.544002	0.0141419	0.285195	0.322855
UMP	0.409439	0.0117347	-0.214762	0.72284	0.989643	-0.211272	0.932881	-0.218253	0.922628	0.412929	0.236543	0.405948	0.251044
Pyridoxal 5-phosphate	0.408766	0.0881378	0.215032	0.815171	0.200706	-0.228304	0.990859	0.658368	0.430564	-0.0345696	1	0.852102	0.104837
C20:2	0.396847	0.0590413	0.0557104	0.967629	0.0886548	0.596025	0.518861	-0.484604	0.726586	0.937161	0.0255754	-0.143468	0.995387
alanine	0.391971	1.50663e-05	-0.0570371	0.781433	0.976749	-0.0610356	0.985563	-0.0530386	0.993065	0.387973	0.00812784	0.39597	0.00703581
ADP-D-glucose	0.381184	0.00722767	0.215398	0.72284	0.700322	0.297314	0.668191	0.133482	0.988777	0.4631	0.0662783	0.299269	0.373603
C22:0(Behenic acid)	0.378689	0.0927621	-0.238054	0.72284	0.281629	0.11483	0.999223	-0.590937	0.286552	0.731572	0.16079	0.0258055	1
C20:4(Arachidonic acid)	0.371865	0.0171512	-0.0182189	0.976384	0.309654	0.185809	0.974537	-0.222246	0.94092	0.575892	0.0496365	0.167837	0.936625
AMP	0.367576	0.252256	-0.0943339	0.963755	0.960141	-0.1415	0.999818	-0.0471682	1	0.32041	0.980017	0.414742	0.933454
C20:1	0.363438	0.0993626	0.248753	0.838191	0.0642542	0.943149	0.241803	-0.445644	0.900995	1.05784	0.0215029	-0.330958	0.84983
threonine	0.358701	3.6109e-05	0.0762364	0.89605	0.281629	0.146118	0.943332	0.00635453	1	0.428583	9.81385e-05	0.288819	0.00272921
N-acetyl-glucosamine-6-P	0.355877	0.0260588	-0.213195	0.652171	0.297113	-0.431817	0.246409	0.00542717	1	0.137255	0.980575	0.574499	0.0662895
N-Acetylputrescine	0.351065	0.443246	0.0500982	0.976384	0.148885	1.15012	0.618642	-1.04992	0.707292	1.45109	0.244608	-0.748958	0.84683
C24:1	0.345391	0.139525	-0.0498504	0.967629	0.0661634	0.662615	0.361208	-0.762316	0.221482	1.05786	0.0340167	-0.367074	0.833416
thymidine	0.341573	0.00588955	-0.0221094	0.972288	0.373504	0.106381	0.997784	-0.150599	0.985839	0.470063	0.0253938	0.213083	0.568091
adenine	0.337845	0.0684567	0.0256092	0.972288	0.484733	0.209085	0.969738	-0.157867	0.992757	0.521321	0.249997	0.154369	0.987751
2-hydroxy-glutarate	0.336137	0.0386112	-0.0993859	0.838191	0.787908	-0.00559297	1	-0.193179	0.946662	0.42993	0.376176	0.242344	0.873761
N-Acetyl-ser	0.330744	0.000263554	0.302571	0.126326	0.427719	0.367827	0.0229655	0.237314	0.242333	0.396	0.00151464	0.265487	0.0260039
C18:2(Linoleic acid)	0.327418	0.300233	-0.0705419	0.967629	0.539941	0.240936	0.998169	-0.38202	0.97881	0.638896	0.669901	0.0159404	1
b-aminoisobutyrate(BAIBA)	0.324196	6.05607e-06	0.305692	0.0669313	0.148885	0.372051	0.00556407	0.239333	0.0966803	0.390555	5.1135e-06	0.257837	0.000243072
5-methylthioadenosine	0.318043	0.0102028	0.00840201	0.976384	0.575599	0.113519	0.981888	-0.0967151	0.992086	0.42316	0.134592	0.212926	0.762062
Pseudouridine	0.31758	1.90845e-05	0.217167	0.554522	0.0852931	0.313981	0.188222	0.120352	0.942023	0.414395	1.5249e-05	0.220766	0.00356103
aminolevulinic acid	0.314374	0.000862985	-0.137526	0.785508	0.95109	-0.119239	0.980646	-0.155812	0.931995	0.33266	0.0153961	0.296087	0.0319085
N-Propionylglycine	0.314374	0.000862985	-0.137526	0.785508	0.95109	-0.119239	0.980646	-0.155812	0.931995	0.33266	0.0153961	0.296087	0.0319085
nicotinamide	0.304831	0.00586664	-0.040054	0.964733	0.331049	-0.165233	0.923645	0.0851251	0.997253	0.179652	0.622679	0.430011	0.0214141
tyrosine	0.30031	0.0894649	0.379072	0.72284	0.913022	0.443606	0.817652	0.314538	0.956318	0.364844	0.586668	0.235776	0.902528
UDP-N-acetyl-glucosamine	0.299014	0.000230591	-0.0511515	0.953109	0.989643	-0.0518408	0.99976	-0.0504621	0.999795	0.298324	0.00491614	0.299703	0.00475214
Deoxycytidine	0.298356	0.0278301	0.0201009	0.967629	0.179639	0.272171	0.615649	-0.231969	0.763731	0.550426	0.0676109	0.0462858	0.999942
Taurodeoxycholic acid	0.297126	0.768021	-1.82556	0.621894	0.760283	-1.14611	0.97663	-2.50501	0.532394	0.976572	0.986305	-0.38232	0.999926
Cholic acid	0.29393	0.696116	-0.187491	0.971681	0.85753	0.190949	0.999999	-0.565931	0.999528	0.67237	0.990599	-0.0845101	1
N-acetyl-lys	0.292061	0.0303013	-0.24289	0.72284	0.954381	-0.220656	0.948403	-0.265124	0.886347	0.314295	0.380092	0.269826	0.540013
proline	0.288336	0.000244732	0.182231	0.672525	0.281629	0.258805	0.449319	0.105657	0.978997	0.36491	0.00085551	0.211761	0.0403564
equol sulfate	0.285714	0.0529534	-0.181778	0.903676	0.500257	-0.0416598	1	-0.321897	0.971498	0.425832	0.213783	0.145595	0.96903
valine	0.285413	0.000341454	0.0961538	0.826565	0.179639	0.197576	0.740786	-0.00526795	1	0.386834	0.000787767	0.183991	0.107734
Adipic acid	0.283638	0.00311579	-0.0164502	0.967629	0.241276	0.11227	0.943489	-0.145171	0.836043	0.412358	0.00816377	0.154917	0.584143
ADP	0.280494	0.185664	0.203042	0.802159	0.933363	0.273708	0.947816	0.132375	0.998813	0.35116	0.811038	0.209827	0.97921
methionine	0.276201	0.000382418	0.0398856	0.967629	0.320551	0.113153	0.996091	-0.0333816	0.999997	0.349468	0.00162587	0.202933	0.0621814
Taurocholic acid	0.273021	0.776627	-2.35975	0.554522	0.95109	-2.06338	0.803557	-2.65611	0.574997	0.569383	0.999077	-0.0233412	1
inositol	0.271862	0.0024859	0.40447	0.0321666	0.766182	0.445766	0.00271775	0.363173	0.01632	0.313159	0.0287992	0.230566	0.140885
N-acetyl-serotonin	0.264035	0.139525	-0.0532297	0.959806	0.952231	-0.00232561	1	-0.104134	0.99895	0.314939	0.799049	0.213131	0.958967
C20:3	0.262081	0.162257	0.0777427	0.963311	0.152408	0.486496	0.624707	-0.331011	0.901796	0.670835	0.121248	-0.146672	0.993482
pyruvate	0.261	0.282034	-0.0854376	0.966869	0.774336	0.0663559	0.999997	-0.237231	0.995225	0.412794	0.805596	0.109207	0.999742
Guanidoacetic acid	0.245844	0.0163057	-0.212441	0.624997	0.952231	-0.188921	0.862582	-0.235961	0.702371	0.269364	0.228785	0.222324	0.411095
methyl equol sulfate	0.23611	0.113527	-0.18499	0.919407	0.787908	-0.0989598	0.999987	-0.271021	0.995804	0.32214	0.559505	0.15008	0.974741
3-phenylpropionate	0.235431	0.0500639	-4.41497	5.05981e-07	0.0506044	-3.97504	7.6672e-13	-4.85491	2.53131e-14	0.675365	0.00491752	-0.204504	0.720713
Lipoic acid	0.230114	0.0311844	-0.219722	0.72284	0.878036	-0.178577	0.943059	-0.260868	0.748633	0.271259	0.297825	0.188969	0.664886
4-Acetamidobutyric acid	0.227074	0.000263554	0.232099	0.72284	0.623746	0.200532	0.940236	0.263666	0.820773	0.195507	0.016607	0.258641	0.00223082
dehydrocarnitine	0.22344	0.00202473	0.213663	0.374322	0.809175	0.242506	0.186125	0.18482	0.454247	0.252283	0.0255191	0.194597	0.104504
DL-Pipecolic acid	0.22321	0.000846552	0.0642618	0.953109	0.974797	0.0689968	0.999632	0.0595268	0.999843	0.227945	0.0187118	0.218475	0.0244411
pantothenate	0.219593	0.00114087	0.112049	0.507626	0.648448	0.148642	0.26606	0.0754572	0.885324	0.256185	0.010985	0.183	0.0807453
glutathione disulfide	0.218855	0.00813874	0.1715	0.810113	0.390094	0.257501	0.860353	0.0854993	0.99945	0.304856	0.0363363	0.132854	0.665808
Phenyllactic acid	0.216011	0.611897	-0.309049	0.815171	0.460405	-0.800159	0.746369	0.18206	0.999847	-0.275099	0.998499	0.707121	0.851789
C18:1(Oleic acid)	0.215119	0.294038	-0.000925013	0.999288	0.153941	0.451284	0.896078	-0.453134	0.894323	0.667328	0.201521	-0.23709	0.960061
allantoin	0.214912	7.87322e-07	0.0527673	0.919407	0.0506044	0.107731	0.973297	-0.00219625	1	0.269875	1.58037e-07	0.159948	2.72619e-05
isoleucine	0.212594	0.000244732	0.0239912	0.967629	0.0506044	0.166575	0.772557	-0.118592	0.939693	0.355178	7.58154e-05	0.0700111	0.656017
Homocitrulline	0.211299	0.000620365	-0.480649	0.624997	0.751697	-0.454166	0.724875	-0.507133	0.623621	0.237782	0.00691195	0.184816	0.0356094
UDP	0.208104	0.330643	0.0970971	0.908338	0.66957	-0.0700064	0.999968	0.264201	0.952951	0.0410004	0.999998	0.375207	0.791833
glycerate	0.205856	0.159304	0.439558	0.451134	0.281629	0.677927	0.083288	0.20119	0.966659	0.444225	0.232142	-0.0325122	0.999995
Gluconolactone	0.204798	0.341409	0.422013	0.526907	0.500257	0.649946	0.262667	0.19408	0.990587	0.432731	0.683731	-0.0231353	1
cholesteryl sulfate	0.203491	0.424801	-0.406778	0.72284	0.423126	-0.0887493	0.999982	-0.724807	0.491106	0.521519	0.678396	-0.114538	0.999779
N-acetyl-thr	0.190394	0.000914018	0.331	0.0697606	0.183173	0.409679	0.00628494	0.25232	0.13447	0.269074	0.0020433	0.111715	0.291223
NN-dimethylarginine	0.188696	0.0648308	-0.159392	0.554522	0.787908	-0.0994081	0.980813	-0.219377	0.564869	0.24868	0.476408	0.128712	0.940555
leucine	0.187402	0.00749398	0.0702888	0.838191	0.230493	0.173237	0.70678	-0.0326593	0.99993	0.29035	0.0166164	0.0844541	0.867215
guanosine	0.183007	0.185329	0.287823	0.624997	0.320551	0.493242	0.258742	0.0824036	0.9996	0.388426	0.310456	-0.0224119	0.999999
lysine	0.181502	0.00853774	-0.0309985	0.959806	0.359651	0.0452445	0.999228	-0.107242	0.932236	0.257745	0.0350524	0.105259	0.718336
N-Butyrylglycine	0.176217	0.103053	0.0617903	0.856781	0.733657	0.137006	0.939354	-0.0134258	1	0.251433	0.548447	0.101001	0.987265
C18:3	0.159876	0.382394	0.250487	0.85351	0.952231	0.29245	0.989164	0.208523	0.99825	0.201839	0.969963	0.117912	0.99818
O-Phosphorylethanolamine	0.159059	0.00999529	0.0185665	0.967629	0.974797	0.023725	0.999967	0.0134079	0.999999	0.164217	0.19179	0.1539	0.24348
NAD+	0.158754	0.00809871	-0.0481948	0.884574	0.576183	-0.0918224	0.93214	-0.00456723	1	0.115126	0.482484	0.202381	0.0585988
L-Fucose	0.150972	0.00544556	0.710252	0.507626	0.106234	0.821295	0.281657	0.599208	0.604117	0.262015	0.00460887	0.0399285	0.983237
C26:0(Cerotic acid)	0.150781	0.58311	-0.491874	0.507626	0.412054	-0.150533	0.999345	-0.833215	0.244879	0.492122	0.80258	-0.19056	0.997724
2-Aminooctanoic acid	0.149976	0.0196405	1.06615	0.0204507	0.266146	1.16122	0.000594764	0.971084	0.00277712	0.245043	0.0439557	0.0549082	0.97944
N-acetyl-arg	0.137596	0.672259	0.0443164	0.972288	0.650092	0.311363	0.986976	-0.22273	0.997842	0.404643	0.95151	-0.12945	0.999895
C24:0(Lignoceric acid)	0.136167	0.611607	-0.431037	0.554522	0.281629	-0.00151759	1	-0.860556	0.194372	0.565686	0.669878	-0.293352	0.975319
3-Hydroxyphenylacetic acid	0.135809	0.20863	-0.0178956	0.967629	0.952231	0.00874182	1	-0.044533	0.999863	0.162446	0.89196	0.109171	0.982206
3-Ureidopropionic acid	0.134623	0.0313981	0.175957	0.72284	0.952231	0.188527	0.852401	0.163386	0.916863	0.147193	0.37428	0.122052	0.570091
Suberic acid	0.127394	0.598802	-0.364922	0.712964	0.0664808	0.407962	0.867176	-1.13781	0.0358088	0.900278	0.128862	-0.64549	0.408515
C18:4	0.125105	0.410031	0.238004	0.881522	0.952231	0.275441	0.991315	0.200566	0.998445	0.162542	0.974653	0.0876677	0.999044
hydroxypyruvate	0.123157	0.355627	-0.349338	0.624997	0.56102	-0.47757	0.475884	-0.221105	0.967152	-0.00507474	1	0.25139	0.739023
1-Methyladenosine	0.108429	0.217971	0.0944204	0.88547	0.952231	0.116144	0.993942	0.0726968	0.999552	0.130153	0.87978	0.0867059	0.98052
dimethylglycine	0.105802	0.141062	0.342638	0.00701117	0.325433	0.446248	0.00135235	0.239028	0.152241	0.209412	0.321746	0.00219152	1
C22:4	0.104854	0.304233	-0.0308094	0.967629	0.135676	0.222744	0.916487	-0.284362	0.785601	0.358407	0.151613	-0.148699	0.893391
Acetylcholine	0.10473	0.0797366	-0.0108424	0.976384	0.952231	-0.0233705	0.999993	0.00168574	1	0.0922017	0.82084	0.117258	0.62356
Proline betaine	0.102638	0.0517669	0.268265	0.72284	0.540271	0.314586	0.731381	0.221944	0.927041	0.148959	0.229683	0.0563167	0.95484
CDP-ethanolamine	0.09549	0.401333	-0.0415092	0.959806	0.336757	-0.208672	0.832776	0.125654	0.982641	-0.0716733	0.998409	0.262653	0.549899
C22:6(Docosahexaenoic acid)	0.0907821	0.581102	0.281949	0.785508	0.357912	0.515136	0.662339	0.0487615	0.999998	0.323969	0.708399	-0.142405	0.99137
glycine	0.0906291	0.231732	-0.109062	0.838191	0.913022	-0.0805458	0.998848	-0.137578	0.979832	0.119145	0.850503	0.0621128	0.992555
taurine	0.0873895	0.00712628	0.0384427	0.810113	0.618549	0.0165039	0.999815	0.0603815	0.85489	0.0654507	0.418497	0.109328	0.0556242
Methyl-Histidine	0.0757465	0.221004	-0.0605938	0.815171	0.989643	-0.0592947	0.993593	-0.061893	0.991956	0.0770456	0.941848	0.0744473	0.95012
N6-N6-N6-Trimethyllysine	0.0748912	0.406519	0.102615	0.88547	0.733657	0.166036	0.967233	0.039195	0.99999	0.138312	0.87557	0.0114708	1
NADP+	0.0745634	0.46927	0.16964	0.771603	0.465242	0.289401	0.679383	0.0498799	0.999952	0.194324	0.74801	-0.0451971	0.999808
Phenylacetic acid	0.072831	0.330643	0.105609	0.72284	0.925016	0.0786517	0.984443	0.132566	0.836874	0.0458739	0.998615	0.099788	0.928575
N-acetyl-his	0.0671809	0.320488	-0.0283326	0.965594	0.952231	-0.0432598	0.999721	-0.0134055	1	0.0522537	0.994984	0.082108	0.952074
Homocarnosine	0.0466173	0.182853	-0.0741404	0.621894	0.985586	-0.072698	0.776407	-0.0755828	0.745354	0.0480597	0.90654	0.0451749	0.927957
cortisol	0.0431536	0.839002	0.191285	0.826565	0.431512	0.458543	0.73878	-0.0759734	0.999975	0.310412	0.91113	-0.224105	0.979982
4-Methylvaleric acid	0.0385606	0.573691	0.0737612	0.72284	0.623746	0.0150463	0.999997	0.132476	0.709552	-0.0201543	0.999983	0.0972755	0.91591
serine	0.0359415	0.47396	0.0557508	0.919407	0.483343	0.112037	0.975509	-0.000535498	1	0.0922278	0.769998	-0.0203448	0.99988
shikimate	0.0267077	0.767718	0.0112508	0.972288	0.404811	0.125838	0.919947	-0.103337	0.967488	0.141295	0.883014	-0.0878797	0.986674
Anserine	0.0177381	0.581102	-0.0874684	0.772272	0.81852	-0.0696765	0.982324	-0.10526	0.884577	0.03553	0.970719	-5.37566e-05	1
N-acetyl-citrulline	0.0100587	0.803449	-0.0828365	0.88547	0.974797	-0.087056	0.995678	-0.078617	0.997521	0.00583913	1	0.0142782	0.999955
Homoarginine	9.84441e-06	0.999859	-0.393353	0.0669313	0.954381	-0.38031	0.0290401	-0.406396	0.0179779	0.0130528	0.999998	-0.0130332	0.999998
Creatinine	-0.00645382	0.778511	-0.0495823	0.919407	0.484733	-0.0232251	0.999992	-0.0759395	0.992805	0.0199034	0.992889	-0.032811	0.921068
uracil	-0.00659463	0.975687	-0.0106122	0.98783	0.960141	0.0232195	1	-0.044444	0.999999	0.0272371	1	-0.0404264	0.999999
FAD	-0.0205114	0.876995	-0.402879	0.554522	0.325433	-0.188401	0.984977	-0.617356	0.21018	0.193966	0.921144	-0.234989	0.832253
GDP	-0.0283251	0.872929	-0.00729591	0.98783	0.960141	0.0228769	1	-0.0374687	0.999998	0.00184769	1	-0.0584979	0.999974
thymine	-0.0286638	0.866643	-0.199391	0.810113	0.952231	-0.156078	0.995914	-0.242705	0.96088	0.0146495	1	-0.0719772	0.999868
citrulline	-0.0319164	0.411547	-0.0952286	0.810113	0.893212	-0.0787697	0.990293	-0.111688	0.946568	-0.0154575	0.999889	-0.0483753	0.949236
hexadecanedioic acid	-0.0325504	0.511513	-0.0603312	0.72284	0.81852	-0.0330186	0.998115	-0.0876438	0.796638	-0.00523779	1	-0.0598629	0.956473
carbamoyl phosphate	-0.0377657	0.0770825	0.00322712	0.971681	0.135964	0.0517871	0.442856	-0.0453329	0.59035	0.0107943	0.999221	-0.0863257	0.0512035
phenol	-0.0407323	0.653874	0.180183	0.838191	0.230493	0.354708	0.840027	0.00565823	1	0.133793	0.89767	-0.215257	0.534117
4-hydroxybenzoate	-0.042982	0.696116	0.191833	0.838191	0.391517	0.341164	0.896139	0.0425031	0.999999	0.106348	0.986386	-0.192312	0.815725
N-Acetylneuraminic acid(sialic acid)	-0.0479437	0.767718	0.090275	0.881522	0.974797	0.102984	0.998469	0.0775655	0.999695	-0.0352342	0.999997	-0.0606532	0.999932
Benzoic acid	-0.0528978	0.430114	-0.0231483	0.967629	0.946265	-0.00102098	1	-0.0452756	0.999742	-0.0307705	0.999753	-0.0750251	0.96974
C16:0(Palmitic acid)	-0.0541369	0.720008	-0.255523	0.838191	0.10791	0.161131	0.999506	-0.672176	0.618037	0.362517	0.534828	-0.470791	0.270179
ornithine	-0.0556755	0.639221	-0.30604	0.668864	0.960141	-0.286915	0.858925	-0.325166	0.777838	-0.0365498	0.999976	-0.0748012	0.998503
C22:5	-0.0569205	0.424801	0.377304	0.72284	0.625059	0.438773	0.749614	0.315835	0.927812	0.00454883	1	-0.11839	0.835734
CTP	-0.0575265	0.883889	0.13731	0.965594	0.952231	0.247976	0.999513	0.0266433	1	0.0531398	1	-0.168193	0.999895
trans-Cinnamate	-0.0744564	0.294038	0.00157449	0.996655	0.989643	0.00272393	1	0.000425041	1	-0.073307	0.976873	-0.0756059	0.973134
C20:0(Arachidic acid)	-0.0790767	0.689487	-0.334374	0.72284	0.201613	0.0667347	0.999989	-0.735482	0.266463	0.322032	0.851903	-0.480185	0.514203
3-Furoic acid	-0.08378	0.395128	-0.0729297	0.836887	0.336757	0.072188	0.99725	-0.218047	0.62207	0.0613377	0.998497	-0.228898	0.541674
phenylalanine	-0.0858374	0.162257	-0.05854	0.901409	0.527256	0.00136675	1	-0.118447	0.949189	-0.0259307	0.999792	-0.145744	0.476328
5-6-Dihydro Thymine	-0.0876288	0.0993626	0.0469293	0.919407	0.276159	0.13293	0.895107	-0.0390717	0.999823	-0.00162781	1	-0.17363	0.159763
o-Cresol	-0.0919022	0.573691	0.408085	0.652171	0.952231	0.444399	0.751053	0.371772	0.869104	-0.0555887	0.999954	-0.128216	0.994691
arginine	-0.0921427	0.168754	-0.107227	0.810509	0.441392	-0.0306113	0.999986	-0.183843	0.824515	-0.0155266	0.999994	-0.168759	0.41595
Diaminopimelic Acid	-0.0935336	0.374789	0.259914	0.624997	0.822779	0.203717	0.906389	0.316112	0.58097	-0.149731	0.906497	-0.0373361	0.999941
C20:5(Eicosapentaenoic acid)	-0.0960455	0.245509	0.094055	0.959739	0.192612	0.259562	0.958701	-0.0714523	0.999965	0.0694618	0.99156	-0.261553	0.219384
Carnosine	-0.0975762	0.0514661	0.0199034	0.967629	0.805432	0.045689	0.999729	-0.00588227	1	-0.0717905	0.84538	-0.123362	0.354242
Phenylglyoxylic acid	-0.098494	0.248167	-0.108094	0.72284	0.292129	-0.243933	0.322583	0.0277436	0.999972	-0.234332	0.348607	0.037344	0.999776
N-acetyl-asp	-0.0996001	0.168754	0.0938944	0.652171	0.952231	0.114052	0.85498	0.0737367	0.979505	-0.0794424	0.973001	-0.119758	0.842551
N-(3-Phenylpropionyl)glycine	-0.101857	0.671633	0.068918	0.966869	0.858817	0.185075	0.997493	-0.0472394	0.999999	0.0143	1	-0.218015	0.989257
nicotinate	-0.127733	0.113233	0.0116654	0.976384	0.974797	0.00514395	1	0.0181868	0.999999	-0.134255	0.790478	-0.121212	0.854502
2-aminobenzoate	-0.130799	0.102647	0.00417981	0.98783	0.0668264	0.23812	0.470512	-0.22976	0.510229	0.103141	0.919033	-0.364739	0.0300277
uridine	-0.134321	0.317291	0.0729252	0.88547	0.336757	0.264088	0.700731	-0.118238	0.990946	0.0568414	0.999861	-0.325484	0.529583
L-Rhamnose	-0.143168	0.27522	-0.042465	0.955529	0.281629	0.166368	0.944005	-0.251298	0.720087	0.0656657	0.999622	-0.352001	0.417385
tryptophan	-0.145008	0.21628	0.00461639	0.98783	0.960141	0.0249695	0.999999	-0.0157367	1	-0.124654	0.971556	-0.165361	0.899918
Creatine phosphate	-0.165995	0.0368943	0.0899662	0.726977	0.989643	0.0889419	0.962016	0.0909906	0.957719	-0.167019	0.500568	-0.164971	0.513576
histidine	-0.187388	0.00148241	-0.040376	0.919407	0.281629	0.0275393	0.999946	-0.108291	0.918359	-0.119473	0.289337	-0.255303	0.00499416
N-acetyl-glucosamine	-0.206996	0.488487	-0.029769	0.976384	0.276159	0.470267	0.867309	-0.529805	0.792957	0.29304	0.986101	-0.707031	0.563027
succinyl-CoA	-0.207055	0.257251	0.204123	0.72284	0.51586	0.390193	0.606997	0.0180528	1	-0.0209852	1	-0.393125	0.605407
Diethanolamine	-0.214479	0.0881378	-0.0206591	0.967629	0.952231	0.0111435	1	-0.0524616	0.999834	-0.182677	0.897914	-0.246282	0.706792
cytidine	-0.23135	0.116897	0.254226	0.72284	0.0668264	0.689336	0.100982	-0.180885	0.984521	0.203761	0.896656	-0.666461	0.0336085
2-Phenylbutyric acid	-0.245304	0.0494015	0.199686	0.810509	0.954381	0.17671	0.991223	0.222662	0.971818	-0.26828	0.490643	-0.222329	0.67928
Retinoic Acid	-0.245997	0.209066	0.118528	0.908338	0.311209	0.416867	0.785131	-0.179811	0.995627	0.0523424	0.999987	-0.544336	0.328131
Guaiacol	-0.250816	0.0457683	0.250709	0.763243	0.153941	0.497925	0.425955	0.00349252	1	-0.00359942	1	-0.498032	0.0459653
UDP-D-glucose	-0.258913	0.0190381	0.0759205	0.92713	0.500257	0.173495	0.972368	-0.021654	1	-0.161339	0.794488	-0.356488	0.101589
asparagine	-0.265969	0.00785992	-0.0412342	0.967629	0.954381	-0.0565001	0.999947	-0.0259683	1	-0.281235	0.140249	-0.250704	0.221504
N-acetyl-ornithine	-0.267582	0.000277254	0.0860762	0.815171	0.500257	0.132526	0.89443	0.039626	0.999802	-0.221132	0.0233055	-0.314032	0.00194288
Indole-3-acetaldehyde	-0.271126	0.00703976	-0.0938867	0.904253	0.396178	-0.194388	0.949779	0.00661438	1	-0.371627	0.0325211	-0.170625	0.596783
UTP	-0.291126	0.0888817	0.0667952	0.966869	0.960141	0.0430149	0.999999	0.0905754	0.999891	-0.314906	0.694096	-0.267345	0.819859
Equol	-0.309806	0.310347	-0.471076	0.770073	0.974797	-0.448565	0.969442	-0.493588	0.952035	-0.287294	0.98578	-0.332317	0.970853
C18:0(Stearic acid)	-0.310943	0.0805165	-0.195118	0.88547	0.148885	0.196383	0.997583	-0.58662	0.666414	0.0805586	0.999594	-0.702444	0.0595853
L-Cysteic acid	-0.317942	0.0881378	0.362412	0.624997	0.204554	0.702199	0.168212	0.0226245	1	0.0218453	1	-0.65773	0.107541
ophthalmic acid	-0.322923	0.199576	0.475742	0.772272	0.974797	0.45689	0.962248	0.494594	0.945564	-0.341775	0.912322	-0.304071	0.947118
Tricarballylic acid	-0.329735	0.00226971	0.497942	0.507626	0.194486	0.65259	0.191032	0.343293	0.799888	-0.175086	0.554651	-0.484384	0.00503538
3-4-5-Trimethoxycinnamic acid	-0.330412	0.0303013	0.444158	0.0669313	0.867607	0.377276	0.387772	0.51104	0.116842	-0.397294	0.387551	-0.26353	0.781715
cyclic-AMP	-0.342055	0.0939486	0.171785	0.815171	0.934921	0.236351	0.969348	0.107219	0.999566	-0.27749	0.896436	-0.406621	0.626135
deoxyuridine	-0.343797	7.26895e-05	0.00229532	0.997615	0.997744	0.00240604	1	0.0021846	1	-0.343687	0.00116612	-0.343908	0.00116003
3-4-Dimethoxyphenylacetic acid	-0.354019	0.0632219	0.552116	0.415306	0.733657	0.672212	0.216347	0.432021	0.677456	-0.233923	0.920881	-0.474114	0.357933
5-Methylcytidine	-0.368792	0.000595024	0.264117	0.0697606	0.925016	0.295891	0.159333	0.232342	0.38974	-0.337018	0.12546	-0.400567	0.0532662
2-phenylpropionate	-0.374435	0.050543	0.340298	0.507626	0.760283	0.229426	0.924275	0.451169	0.368422	-0.485306	0.324055	-0.263563	0.866222
Indole-2-carboxylic acid	-0.400455	0.074326	0.263716	0.763243	0.976749	0.250371	0.972787	0.277061	0.955876	-0.4138	0.677365	-0.38711	0.735388
3-Methylindole	-0.426164	0.0163057	0.24137	0.785508	0.36512	0.0381352	0.999999	0.444605	0.662031	-0.629399	0.0603169	-0.222929	0.877455
biotin	-0.449898	0.0894649	0.200189	0.88547	0.106234	0.86685	0.34267	-0.466473	0.891328	0.216764	0.990177	-1.11656	0.0445881
Phenaceturic acid	-0.474984	0.00597163	0.154395	0.810113	0.952231	0.183533	0.970397	0.125256	0.995883	-0.445846	0.180056	-0.504123	0.105941
carnitine	-0.539538	0.00015198	0.0577034	0.88547	0.85753	0.111887	0.981458	0.00352018	1	-0.485355	0.0633653	-0.593722	0.0195808
Aminoadipic acid	-0.55927	7.78031e-06	0.227488	0.624997	0.576534	0.180498	0.881381	0.274478	0.548581	-0.606261	2.2816e-05	-0.51228	0.000108225
Ribothymidine	-0.566799	0.0650634	0.162757	0.904253	0.247865	0.667553	0.643173	-0.342038	0.975408	-0.0620029	0.999996	-1.07159	0.101876
guanine	-0.58359	0.0285337	0.0677868	0.963755	0.0506044	0.908525	0.105593	-0.772951	0.223751	0.257148	0.981479	-1.42433	0.0132037
deoxyinosine	-0.673259	0.222172	-0.0396025	0.976384	0.168974	1.07385	0.705541	-1.15305	0.636814	0.440191	0.994927	-1.78671	0.236777
phosphoenolpyruvate	-0.680359	0.00287502	0.317925	0.772272	0.241614	0.0147643	1	0.621087	0.520764	-0.983521	0.00768615	-0.377198	0.554156
N-acetyl-trp	-0.680805	0.0068004	0.302448	0.712964	0.787908	0.184477	0.991437	0.420418	0.692684	-0.798776	0.0737289	-0.562835	0.308575
Urocanic acid	-0.692118	0.0736503	-0.15323	0.908338	0.632599	0.141897	0.999879	-0.448356	0.941043	-0.396991	0.966506	-0.987244	0.344968
4-aminobenzoate	-0.702198	2.5935e-05	0.153385	0.88547	0.539941	0.229888	0.973113	0.0768818	0.999935	-0.625695	0.000720489	-0.778701	0.000107386
2-Methylhippuric acid	-0.745241	0.0195353	0.381513	0.624997	0.952231	0.314162	0.957423	0.448863	0.810481	-0.812591	0.267883	-0.677891	0.44768
Phenylacetylglycine	-0.745241	0.0195353	0.381513	0.624997	0.952231	0.314162	0.957423	0.448863	0.810481	-0.812591	0.267883	-0.677891	0.44768
ATP	-0.777621	5.85055e-05	0.158153	0.810113	0.634936	0.240005	0.887049	0.0763009	0.999693	-0.695769	0.00220102	-0.859472	0.000387989
Pyroglutamic acid	-0.842536	7.92504e-05	0.0506898	0.959806	0.168974	0.293112	0.658994	-0.191733	0.928252	-0.600113	0.015854	-1.08496	0.000152734
glycerol-3-P	-0.883491	0.00143818	-0.039085	0.967629	0.391517	0.208843	0.97835	-0.287013	0.906002	-0.635563	0.184351	-1.13142	0.00747883
N-methyl-asp	-0.943585	9.88633e-06	0.108872	0.72284	0.878036	0.14801	0.838482	0.0697334	0.995446	-0.904447	0.00010488	-0.982724	4.90857e-05
GTP	-0.996395	3.16385e-07	0.0517827	0.963051	0.976749	0.0553269	0.999859	0.0482386	0.999937	-0.992851	3.48766e-07	-0.999939	3.24569e-07
GABA (real)	-1.03085	1.76325e-08	0.150845	0.540699	0.960141	0.16603	0.749136	0.135661	0.880583	-1.01567	4.84766e-05	-1.04603	3.6869e-05
3-phosphoglycerate	-1.11388	0.0020909	0.270168	0.815171	0.433708	-0.0350623	1	0.575399	0.75994	-1.41911	0.0122757	-0.80865	0.228776
D-phospho-L-serine	-1.17758	0.0877877	0.0292788	0.98783	0.648448	-0.486762	0.997481	0.54532	0.995314	-1.69362	0.396571	-0.661538	0.977189
glutamine	-1.52694	2.68889e-07	-0.0302373	0.963755	0.989643	-0.0329552	0.99995	-0.0275193	0.999983	-1.52965	2.42367e-07	-1.52422	2.51275e-07
Isovaleryl carnitine C5	-1.62071	1.13086e-05	0.343357	0.790565	0.974797	0.361878	0.956732	0.324836	0.974099	-1.60219	9.73391e-05	-1.63924	7.90763e-05
aspartate	-2.01572	2.68889e-07	0.0859657	0.904253	0.0506044	0.548382	0.12298	-0.376451	0.469447	-1.5533	3.19166e-06	-2.47814	2.85293e-08
dAMP	-2.5101	3.10478e-05	-0.136516	0.92713	0.472222	0.186014	0.999158	-0.459047	0.912984	-2.18757	0.00117877	-2.83263	0.000128757
