# Supplementary material for: Effect of Interleukin-15 Receptor Alpha Ablation on the Metabolic Responses to Moderate Exercise Simulated by in vivo Isometric Muscle Contractions
Source: Front Physiol. 2019 Nov 26;10:1439. doi: 10.3389/fphys.2019.01439 (PMC6901992; doi:10.3389/fphys.2019.01439)
Supplement: TABLE S4 — Partial least squares discriminant analysis VIP scores. [file Table_4.XLSX]

## Sheet: PLS-DA_VIP
Metabolite	Comp. 1	Comp. 2
glycine	0.068261	0.14728
pyruvate	0.048253	0.3082
alanine	0.14879	0.23765
lactate	0.16894	0.54635
phenol	0.17113	0.33982
dimethylglycine	0.42355	0.46996
b-aminoisobutyrateBAIBA	0.50091	0.43654
GABA real	0.39039	0.5438
hydroxypyruvate	0.30813	0.47746
2-hydroxybutyrate	0.63797	0.47182
3-hydroxybutyrate	1.0147	0.78255
serine	0.078942	0.071818
glycerate	0.5809	0.53892
o-Cresol	0.38778	0.64474
Hypotaurine	1.3704	1.0731
uracil	0.014894	0.10864
Creatinine	0.056548	0.09353
3-Furoic acid	0.12295	0.11001
Dihydrouracil	0.54323	1.0382
proline	0.34951	0.29792
fumarate	1.6699	1.4755
N-acetyl-gly	1.0698	0.80759
4-Methylvaleric acid	0.099629	0.096756
indole	1.1461	2.0417
valine	0.25577	0.18354
succinate	1.4829	1.5008
threonine	0.27368	0.19735
3-Hydroxyisovaleric acid	0.74324	0.53462
2-Hydroxyvaleric acid	0.83633	0.60024
Benzoic acid	0.053109	0.038816
nicotinamide	0.12032	0.20867
taurine	0.087953	0.063226
Guaiacol	0.13417	0.39385
thymine	0.22886	0.24212
DL-Pipecolic acid	0.18832	0.13605
Glutaconic acid	0.57544	0.44704
Pyroglutamic acid	0.39682	0.3766
2-keto-isocaproateleu	0.75289	0.73409
N-Propionylglycine	0.021053	0.32049
N-acetyl-ala	0.37743	0.30335
aminolevulinic acid	0.021053	0.32049
creatine	0.17053	0.26906
leucine	0.1756	0.12605
isoleucine	0.13951	0.12989
asparagine	0.18655	0.14469
3-Methylindole	0.030291	0.3689
ornithine	0.35752	0.37505
aspartate	0.98717	0.99456
3-Ureidopropionic acid	0.26049	0.21005
2-Hydroxycaproic acid	0.57228	0.6007
2-hydroxy-b-methylvalerate	0.5384	0.49345
malate	1.711	1.4871
adenine	0.20831	0.23253
hypoxanthine	1.4201	1.1506
Phenylacetic acid	0.15208	0.1366
Urocanic acid	0.53464	0.38459
2-aminobenzoate	0.065555	0.048981
4-hydroxybenzoate	0.1824	0.36771
carbamoyl phosphate	0.016764	0.018611
O-Phosphorylethanolamine	0.10504	0.10797
a-ketoglutarate	2.0187	1.6354
Adipic acid	0.13425	0.1259
glutamine	0.8499	0.72278
4-Acetamidobutyric acid	0.37011	0.33221
lysine	0.063983	0.11608
N-Acetyl-ser	0.50108	0.41856
N-methyl-asp	0.38862	0.47362
2-hydroxy-glutarate	0.073546	0.21259
Citramalic acid	0.3386	0.42734
trans-Cinnamate	0.038178	0.028566
methionine	0.19059	0.13677
Phenylglyoxylic acid	0.16848	0.13428
guanine	0.23987	0.29649
2-phenylpropionate	0.16392	0.51536
3-phenylpropionate	4.6015	6.1019
xanthine	0.99481	0.99789
3-Hydroxyphenylacetic acid	0.05355	0.10067
histidine	0.14356	0.10383
orotate	0.49565	0.41645
allantoin	0.17157	0.12883
N-Tiglylglycine	0.56131	0.40277
Indole-3-acetaldehyde	0.2457	0.17797
N-acetyl-val	0.56688	0.43324
8-Aminooctanoic acid	1.8022	1.6137
2-Oxoadipic acid	0.80568	0.58007
Aminoadipic acid	0.05584	0.39196
2-Hydroxyoctanoic acid	0.57003	0.59113
Indole-2-carboxylic acid	0.067984	0.35673
N-acetyl-thr	0.45637	0.43551
3-Hydroxymethylglutarateleu	0.5385	0.38641
phenylpyruvate	0.19029	0.35287
2-Phenylbutyric acid	0.082488	0.39979
L-Fucose	0.84137	1.0096
phenylalanine	0.10864	0.095042
Phenyllactic acid	0.21528	0.55167
phosphoenolpyruvate	0.02383	0.48511
Uric acid	0.6807	0.58619
Glyceraldehyde-3-phosphate	1.5862	1.5138
L-Cysteic acid	0.21785	0.52608
glycerol-3-P	0.51488	0.39195
Suberic acid	0.32255	0.43713
N-acetyl-ornithine	0.051093	0.16749
arginine	0.16415	0.13982
N-acetyl-asp	0.047216	0.11635
citrulline	0.11906	0.13169
Tricarballylic acid	0.35666	0.67338
N-Formyl-L-methionine	0.38953	0.33031
hippuric acid	2.9179	4.7557
glucosamine	1.2343	0.91498
hydroxyphenylpyruvate	0.39042	0.34198
inositol	0.57866	0.55059
glucose	1.6877	1.2521
Fructose	1.1975	0.86202
tyrosine	0.5667	0.44156
p-hydroxyphenyllactate	0.3149	0.37785
3-4-Dihydroxyhydrocinnamic acid	0.3149	0.37785
sorbitol	1.3907	1.005
4-Pyridoxic acid	0.38004	0.33791
3-phosphoglycerate	0.30708	0.56945
C110Undecanoic acid	0.014378	0.99374
N-acetyl-gln	2.2236	1.7909
N-acetyl-lys	0.10372	0.39867
N-acetyl-glu	0.69987	0.51609
Indole-3-propionate IPA	0.38349	1.2374
Homocitrulline	0.40155	0.63515
Catechol sulfate	0.022775	0.66525
Diaminopimelic Acid	0.22824	0.29037
N-acetyl-met	0.52389	0.50612
citrate/isocitrate	0.49385	0.3636
Phenylacetylglycine	0.0095218	0.65673
Phenaceturic acid	0.088981	0.39434
2-Methylhippuric acid	0.0095218	0.65673
Galacturonic acid	1.012	0.94623
5-keto-D-gluconic acid	1.4987	1.1394
2-dehydrogluconate	1.012	0.94623
D-Galactonic acid	1.8734	1.3476
3-4-Dimethoxyphenylacetic acid	0.40167	0.75789
D-erythrose-4-phosphate	1.4397	1.1367
N-Octanoylglycine	1.1027	0.86572
Sebacic acid	1.2461	1.0883
tryptophan	0.072694	0.055879
Indolelactic acid	0.36561	0.82615
Lipoic acid	0.11208	0.4026
N-acetyl-phe	0.18355	0.61078
Creatine phosphate	0.0074622	0.13637
Indoxyl sulfate	1.5543	2.4709
deoxyribose-phosphate	1.6614	1.3044
N-acetyl-citrulline	0.083316	0.17786
pantothenate	0.23755	0.17504
N-acetyl-tyr	0.14968	0.92344
C142	1.0364	0.7508
Gluconolactone	0.56154	0.57223
Carnosine	0.03093	0.022282
C141Myristoleic acid	0.77107	0.68584
Deoxycytidine	0.18126	0.17447
deoxyuridine	0.18161	0.13645
C140Myristic acid	0.059152	0.51892
ribose-phosphate	1.205	1.0249
3-4-5-Trimethoxycinnamic acid	0.2987	0.6656
C152	1.0293	0.74024
Anserine	0.084165	0.15628
C151	0.2581	1.0263
thymidine	0.1592	0.21781
Equol	0.6703	0.6309
C150	0.49791	1.167
cytidine	0.14836	0.25814
uridine	0.0061726	0.038099
Pseudouridine	0.40258	0.29937
biotin	0.026513	0.17244
deoxyinosine	0.40287	0.35263
C162	0.44911	0.42066
C161Palmitoleic acid	0.15644	0.38577
C160Palmitic acid	0.3026	0.29816
6-phosphogluconolactone	0.86438	0.76895
Tetradecanedioic acid	0.50196	0.61154
D-glucosamine-1/6-phosphate	1.4899	1.1629
fructose-6-phosphate	1.5165	1.2029
1_3-diphosphoglyceric acid	0.20286	0.24964
C172	0.57639	0.70178
inosine	1.4214	1.3898
C171	0.028941	0.84292
C170	0.30934	0.79582
6-phosphogluconate	0.73599	1.9694
C184	0.32184	0.2807
C183	0.35382	0.29708
C182Linoleic acid	0.099764	0.23483
C181Oleic acid	0.11418	0.13232
guanosine	0.40618	0.36417
C180Stearic acid	0.37541	0.27316
hexadecanedioic acid	0.082031	0.079258
sedoheptoluse-7-phosphate	2.0582	1.5517
L-arginino-succinate	1.1717	1.4786
C191	0.24474	0.65201
C190	0.074074	0.53978
Retinoic Acid	0.0047871	0.2294
N-acetyl-glucosamine-6-P	0.037753	0.37564
C205Eicosapentaenoic acid	0.049292	0.083162
C204Arachidonic acid	0.17959	0.2287
C203	0.22357	0.17105
glutathione	0.19885	1.9171
C202	0.27213	0.25632
N-Acetylneuraminic acidsialic acid	0.070998	0.095705
C201	0.46095	0.35989
C200Arachidic acid	0.40039	0.42973
equol sulfate	0.041677	0.33956
UMP	0.010754	0.48776
C211	0.12741	0.95589
C210	0.074121	0.64931
C226Docosahexaenoic acid	0.35052	0.30274
cyclic-AMP	0.00081077	0.16966
C225	0.37354	0.42189
dAMP	1.4901	1.2069
C224	0.023148	0.15552
C223	1.0996	0.89384
methyl equol sulfate	0.071675	0.39785
C222	0.76138	0.7137
AICAR	2.1819	1.6354
C221Erucic acid	0.033949	0.41987
C220Behenic acid	0.052158	0.38841
Cellobiose	0.25349	0.58053
AMP	0.095788	0.35138
IMP	3.2196	2.9295
C231	0.60552	0.63347
C230	0.13376	0.50916
C246	0.38305	0.30655
C245	0.54787	0.42167
C244	1.6672	1.1963
cortisol	0.22793	0.25555
C243	3.6692	2.6765
GMP	2.1325	1.8944
C242	0.43899	0.91829
C241	0.13154	0.30473
C240Lignoceric acid	0.38865	0.61732
C251	0.7177	0.94855
C250	0.60425	0.55583
C261	0.55367	0.80257
C260Cerotic acid	0.44597	0.75206
CDP	0.024286	0.60374
UDP	0.21539	0.16176
Cholic acid	0.043396	0.67201
Cysteine-glutathione disulphide	0.78615	0.62529
ADP	0.3676	0.28511
GDP	0.022978	0.021287
CDP-ethanolamine	0.0066774	0.084264
cholesteryl sulfate	0.32663	0.5428
CTP	0.11623	0.08356
UTP	0.084345	0.07305
Taurodeoxycholic acid	1.7957	2.1854
ATP	0.24699	0.38414
Taurocholic acid	2.3807	2.8873
GTP	0.47802	0.48912
UDP-D-glucose	0.057327	0.17291
UDP-glucuronate	0.38191	0.27554
ADP-D-glucose	0.43474	0.34328
UDP-N-acetyl-glucosamine	0.10532	0.22434
glutathione disulfide	0.30082	0.21699
NAD	0.03339	0.14294
NADH	1.795	2.938
NADP	0.22157	0.18288
FAD	0.44239	0.53494
acetyl-CoA	0.38888	1.932
succinyl-CoA	0.10772	0.24557
4-aminobenzoate	0.21171	0.49041
Proline betaine	0.34221	0.39752
Acetylcholine	0.044463	0.052099
2-Aminooctanoic acid	1.2219	1.4234
dehydrocarnitine	0.34842	0.29138
carnitine	0.22708	0.30506
Methyl-Histidine	0.024329	0.083658
N6-N6-N6-Trimethyllysine	0.14998	0.16723
Acetyl carnitine C2	0.93696	0.98567
Butyryl carnitine C4	1.3038	0.95878
Homocarnosine	0.054431	0.10922
Isovaleryl carnitine C5	0.50007	1.0686
5-Methylcytidine	0.085365	0.44136
Hexanoyl carnitine C6	3.7057	2.8055
adenosine	0.11242	0.37874
Octanoyl carnitine C8	4.1529	3.0659
5-methylthioadenosine	0.17928	0.15672
Decadienoyl carnitine C102	3.2707	2.4759
Decenoyl carnitine C101	2.6847	2.0563
Decanoyl carnitine C10	2.9987	2.3916
Lauroyl carnitine C12	2.5077	1.945
Tetradecadienoyl carnitine C142	3.7094	2.6657
Tetradecenoyl carnitine C141	2.9486	2.1467
Myristoyl carnitine C14	2.324	1.8333
Hexadecadienoyl carnitine C162	2.6014	2.3635
Palmitoyl carnitine C16	1.822	1.4919
